# Supplementary material
Source: PubMed Central journal article supplement (PMC2330295)
Supplement: plntphys_pp.108.118430_1.pdf [file plntphys_pp.108.118430_1.pdf]

| Marker       |     | Primers                            | Fragment Size (bp) | Restriction enzyme |
|--------------|-----|------------------------------------|--------------------|--------------------|
| T0337        | For | 5'-TGCAGTCCAATCAAATGTCATGTCCA-3'   | 983                | N/A <sup>***</sup> |
|              | Rev | 5'-GTATCTCATGGTGAATGCACTTGTCGTA-3' |                    |                    |
| T0487        | For | 5'-GACAGCGTGAAATGATTCTCGAGGCA-3'   | 996                | HhaI               |
|              | Rev | 5'-GCTGCCACTATTGAGGTACGCAACAAC-3'  |                    |                    |
| CT265        | For | 5'-GCGAGGCAACACTATTCACCTTGATGT-3'  | 959                | BstXI              |
|              | Rev | 5'-GGAAGAAGTGGTCATCTTTGGGCGCA-3'   |                    |                    |
| 20K14T7      | For | 5'-GGGTCCAAGTACAGATGCAACTTCC-3'    | 716                | HinfI              |
|              | Rev | 5'-GAACGTTACTAGAGTATCCAAGGAA-3'    |                    |                    |
| CT148        | For | 5'-GTACAGCCTAGTAAGTAACACGC-3'      | 830                | HindIII            |
|              | Rev | 5'-GCATCATGAATGTGAATGATACAGA-3'    |                    |                    |
| T1581        | For | 5'-GCTACTAGAAGAACCTAGTCAGC-3'      | 470                | $\alpha$ TaqI      |
|              | Rev | 5'-GTAATCGCCGGTGTGCGTAAGCAGC-3'    |                    |                    |
| C_2At5g47390 | For | 5'-TGGTGGCTCTGTTGATGGTTATGC-3'     | 1202               | $\alpha$ TaqI      |
|              | Rev | 5'-ACATCCTATGCTCCTCCTCAGTCC-3'     |                    |                    |

**Table S1.** Development of PCR based markers flanking the *gf* locus.

RFLP markers were converted to PCR based markers using the forward (For) and reverse (Rev) primers. Following DNA sequence analysis of cloned fragments from the parents of our F2 mapping population, *S. lycopersicum* (*gf/gf*) and the *S. pennellii* introgression line (IL8-3) restriction enzymes were chosen that yielded polymorphic fragments between the parents that could be utilized as genetic markers. Fragment sizes are given for amplification products from *S. lycopersicum*.

<sup>\*\*\*</sup> For T0337 the amplification product from IL8-3 was approximately 150 bp larger than from *S. lycopersicum* allowing detection of the polymorphic fragments by agarose gel electrophoresis without a restriction enzyme digest.
